# Supplementary material for: Necroptosis Is a Mechanism of Death in Mouse Induced Hepatocyte-Like Cells Reprogrammed from Mouse Embryonic Fibroblasts
Source: PubMed Central journal article supplement — Mol Cells. 2018 Jul 10;41(7):639–45. doi: 10.14348/molcells.2018.2353 (PMC6078850; doi:10.14348/molcells.2018.2353), 2018-07-10
Supplement: molce-41-7-639-suppl.pdf [file molce-41-7-639-suppl.pdf]

## Supplementary Figure 1.

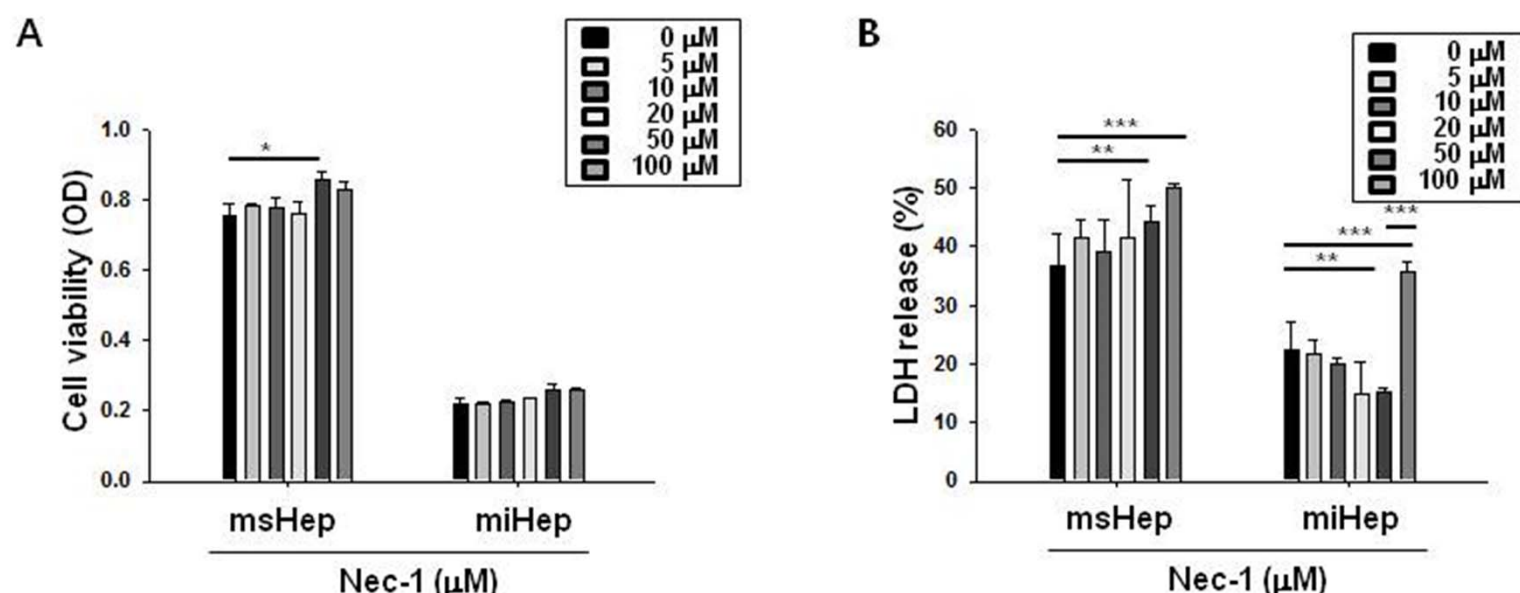

### Supplementary Fig. 1. Effect of necrostatin-1 (NEC-1) concentration on mouse-induced hepatocyte-like cells (miHEPs)

Mouse hepatocytes-SV40 cells (msHeps) and miHeps were treated with various concentration of NEC-1. (A) Cell proliferation was analyzed by 3-(4,5-dimethylthiazol-2-yl)-2,5-diphenyltetrazolium bromide (MTT) assay. (B) Cytotoxicity was analyzed by lactate dehydrogenase (LDH) test. The percentage of LDH was calculated from the maximum LDH release (100%) induced by lysing cells with 0.1% Triton X-100. Data are expressed as the mean  $\pm$  S.E.M; \* $P < 0.05$ , \*\* $P < 0.01$  and \*\*\* $P < 0.001$ .

## Supplementary Figure 2.

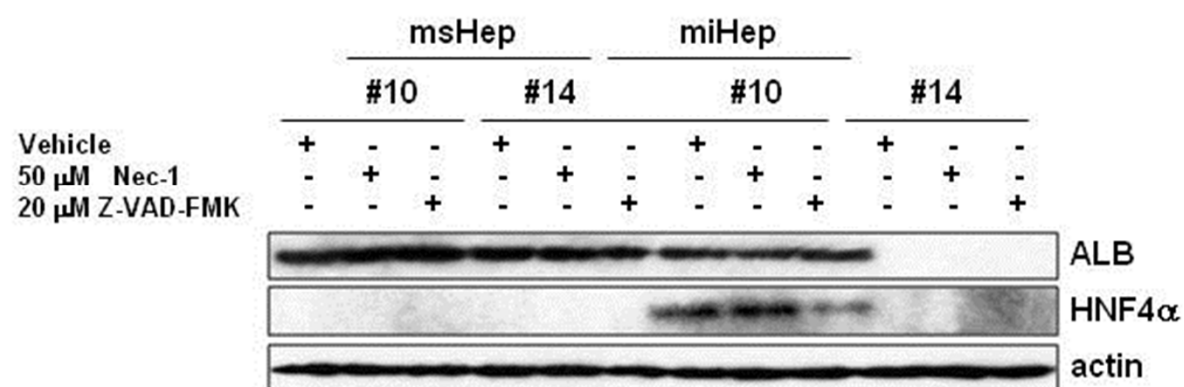

### Supplementary Fig. 2. Effect of NEC-1 on hepatic function

msHeps and miHeps were treated with vehicle (DMSO), 50  $\mu$ M NEC-1, or 20  $\mu$ M Z-VAD-FMK. msHep and miHep lysates were subjected to western blot analysis with anti-ALB and anti-hepatocyte nuclear factor 4 alpha (HNF4 $\alpha$ ) antibodies. Actin was used as a loading control.
